# Supplementary material for: What’s Your Identification Strategy? Innovation in Corporate Finance Research
Source: Atypon-hosted journal article supplement (doi:10.1287/mnsc.2016.2437), 2016-06-03

# Internet Appendix for “What’s your Identification Strategy? Innovation in Corporate Finance Research”

December 21, 2015

This appendix contains additional material that we mention in the paper, but do not report to preserve space.

Table IA.1 presents the assignment of the two most cited articles every year into empirical (or not) and corporate finance (or not), as well as the source for the corporate finance classification (JFE, RFS, EconLit JEL codes, or Manual). A visual inspection of this table reveals that our classification performs well. Out of 90 cases, the only potential misclassification is the article by Bansal and Yaron (2004), which is classified as corporate finance by EconLit.

We report two figures that present publication trends within our sample consistent with the findings of other articles focusing on publication trends in economics journals (e.g. Hamermesh (2013), Card and DellaVigna (2013), and Ellison (2002)). Figure IA.1 describes several interesting patterns in our data. Panel A indicates that the annual number of articles published in the top-three finance journals has increased over time. The number of JF articles reached a maximum of 121 in 1977 and has declined since then to 60 per year. In contrast, both the JFE and the RFS have steadily increased the number of articles since their creation (in 1974 and 1988, respectively). For the RFS, the increase is notable in 2009 when the journal increased the number of issues from eight to twelve per year.

Panel B reveals that finance articles have become significantly longer. A typical JF article was around 12 pages long in the seventies, 14 pages long in the eighties, 24 pages long in the nineties, and around 36 pages in recent years. Average page length in the JFE decreased from 31 pages to 23 pages after reformatting in 2008.

Panel C indicates a large expansion of co-authored work over the last forty years. In the early 1970s, the average number of authors per article is 1.4, with 62% of articles being

single-authored, 36% having two authors, and only 2% having three authors or more. In the last five years, the average article is written by 2.4 authors. In 2012, the proportion of single-authored articles is down to 15%, with 41% of published articles having two authors, and 44% having at least three. While less than 40% of all articles are co-authored in the seventies, 85% of all published work is co-authored in 2012.

Panel D displays the acceptance rates at the top finance journals. We obtain this information directly from the journals. For the JF and the JFE, periodical editorial reports provide data on acceptance rates (for all years for the JFE and starting in 1985 for the JF). For RFS, the information was provided by the editorial office for the year 2006 onwards. Acceptance rates have steadily fallen for each journal. In 1980, the JFE published around 20% of submitted articles. This number is now about 10%. The JF and RFS acceptance rates have gone down to about 6% of all submitted articles in the most recent years.

Between 1970 and 2012, 4,812 authors published at least one article in a top finance journal. We report the distribution of the number of published articles per author in Figure IA.2. Less than half of the authors publish more than once (45%), 12% publish more than five articles, and only 5% publish more than ten articles. To be in the top percentile of the distribution, an author needs to have at least 19 publications.

## References

- Bansal, R., Yaron, A., 2004. Risks for the long run: A potential resolution of asset pricing puzzles. *The Journal of Finance* 59 (4), 1481–1509.
- Card, D., DellaVigna, S., 2013. Nine facts about top journals in economics. *Journal of Economic Literature* 51 (1), 144–161.
- Ellison, G., 2002. Evolving standards for academic publishing: A q-r theory. *The Journal of Political Economy* 110 (5), 994–1034.
- Hamermesh, D. S., 2013. Six decades of top economics publishing: Who and how? *Journal of Economic Literature* 51, 1–11.

**Table IA.1: Two Most Cited Articles By Year**

This table lists the two most cited articles in each year between 1970 and 2012 in the JF, JFE, and RFS respectively. Cites is the TimesCited variable from Web of Knowledge as of November 2013. We obtain citation data for 6,692 articles out of our sample of 6,797 published works in the top-three finance journals. The procedure to classify articles as empirical and corporate finance is described in detail in Section III. For the corporate finance classification, we first defer to JEL codes when available directly from the journal, then to those from EconLit. We assign articles into the corporate finance group if they contain at least one JEL code starting with G3 (“Corporate Finance and Governance”). We manually assign the remainder as described in Section III. The source of the information for the corporate classification is reported under “CF Source.”

| Article                              | Cites | Empirical | CF | CF Source |
|--------------------------------------|-------|-----------|----|-----------|
| Fama (1970) JF                       | 2,468 | 0         | 0  | Manual    |
| Mao (1970) JF                        | 84    | 0         | 1  | Manual    |
| Lewellen (1971) JF                   | 176   | 0         | 1  | Manual    |
| Blume (1971) JF                      | 162   | 1         | 0  | Manual    |
| Black and Scholes (1972) JF          | 179   | 1         | 0  | Manual    |
| Kraus and Stoll (1972) JF            | 171   | 1         | 0  | Manual    |
| Kraus and Litzenberger (1973) JF     | 174   | 0         | 1  | Manual    |
| Blume and Friend (1973) JF           | 101   | 1         | 0  | Manual    |
| Merton (1974) JF                     | 1,389 | 0         | 1  | Manual    |
| Myers (1974) JF                      | 91    | 0         | 1  | Manual    |
| McCulloch (1975) JF                  | 140   | 1         | 0  | Manual    |
| Ibbotson and Jaffe (1975) JF         | 119   | 1         | 1  | Manual    |
| Jensen and Meckling (1976) JFE       | 7,750 | 0         | 1  | Manual    |
| Merton (1976) JFE                    | 995   | 0         | 0  | Manual    |
| Myers (1977) JFE                     | 1,650 | 0         | 1  | Manual    |
| Vasicek (1977) JFE                   | 1,182 | 0         | 0  | Manual    |
| Margrabe (1978) JF                   | 356   | 0         | 0  | Manual    |
| Stoll (1978) JF                      | 257   | 0         | 0  | Manual    |
| Cox, Ross, and Rubinstein (1979) JFE | 1,175 | 0         | 0  | Manual    |
| Smith Jr. and Warner (1979) JFE      | 650   | 0         | 1  | Manual    |
| Brown and Warner (1980) JFE          | 633   | 1         | 0  | Manual    |
| Merton (1980) JFE                    | 573   | 1         | 0  | Manual    |
| Banz (1981) JFE                      | 678   | 1         | 0  | Manual    |
| Reinganum (1981) JFE                 | 307   | 1         | 0  | Manual    |
| Christie (1982) JFE                  | 386   | 1         | 0  | Manual    |
| Marsh (1982) JF                      | 174   | 1         | 1  | Manual    |
| Jensen and Ruback (1983) JFE         | 916   | 1         | 1  | Manual    |
| Adler and Dumas (1983) JF            | 378   | 1         | 0  | Manual    |

| Article                                                     | Cites | Empirical | CF | CF Source |
|-------------------------------------------------------------|-------|-----------|----|-----------|
| Myers and Majluf (1984) JFE                                 | 2,198 | 0         | 1  | Manual    |
| Myers (1984) JF                                             | 732   | 0         | 1  | Manual    |
| Brown and Warner (1985) JFE                                 | 1,044 | 1         | 0  | Manual    |
| Glosten and Milgrom (1985) JFE                              | 871   | 0         | 0  | Manual    |
| Amihud and Mendelson (1986) JFE                             | 663   | 1         | 0  | Manual    |
| Black (1986) JF                                             | 501   | 0         | 0  | Manual    |
| Hull and White (1987) JF                                    | 894   | 0         | 0  | Manual    |
| French, Schwert, and Stambaugh (1987) JFE                   | 688   | 1         | 0  | Manual    |
| Morck, Shleifer, and Vishny (1988) JFE                      | 1,220 | 1         | 1  | Manual    |
| Weisbach (1988) JFE                                         | 722   | 1         | 1  | Manual    |
| Fama and French (1989) JFE                                  | 632   | 1         | 0  | Manual    |
| Schwert (1989) JF                                           | 573   | 1         | 0  | Manual    |
| McConnell and Servaes (1990) JFE                            | 678   | 1         | 1  | Manual    |
| Carter and Manaster (1990) JF                               | 485   | 1         | 1  | Manual    |
| Fama (1991) JF                                              | 845   | 1         | 0  | EconLit   |
| Lee and Ready (1991) JF                                     | 553   | 1         | 0  | EconLit   |
| Fama and French (1992) JF                                   | 1,842 | 1         | 0  | EconLit   |
| Smith Jr. and Watts (1992) JFE                              | 648   | 1         | 1  | EconLit   |
| Fama and French (1993) JFE                                  | 2,487 | 1         | 0  | EconLit   |
| Heston (1993) RFS                                           | 1,246 | 0         | 0  | EconLit   |
| Petersen and Rajan (1994) JF                                | 677   | 1         | 1  | EconLit   |
| Lakonishok, Shleifer, and Vishny (1994) JF                  | 629   | 1         | 0  | EconLit   |
| Rajan and Zingales (1995) JF                                | 691   | 1         | 1  | EconLit   |
| Loughran and Ritter (1995) JF                               | 543   | 1         | 1  | EconLit   |
| Fama and French (1996) JF                                   | 803   | 1         | 0  | EconLit   |
| Yermack (1996) JFE                                          | 734   | 1         | 1  | Direct    |
| Shleifer and Vishny (1997) JF                               | 1,650 | 0         | 1  | EconLit   |
| La Porta, Lopez-De-Silanes, Shleifer, and Vishny (1997) JF  | 1,549 | 1         | 1  | EconLit   |
| Daniel, Hirshleifer, and Subrahmanyam (1998) JF             | 663   | 0         | 0  | EconLit   |
| Fama (1998) JFE                                             | 637   | 1         | 0  | Direct    |
| La Porta, Lopez-De-Silanes, and Shleifer (1999) JF          | 1,525 | 1         | 1  | EconLit   |
| Core, Holthausen, and Larcker (1999) JFE                    | 473   | 1         | 1  | Direct    |
| Claessens, Djankov, and Lang (2000) JFE                     | 741   | 1         | 1  | Direct    |
| La Porta, Lopez-De-Silanes, Shleifer, and Vishny (2000) JFE | 689   | 1         | 1  | Direct    |
| Graham and Harvey (2001) JFE                                | 521   | 1         | 1  | Direct    |
| Longstaff and Schwartz (2001) RFS                           | 504   | 1         | 0  | EconLit   |
| La Porta, Lopez-De-Silanes, Shleifer, and Vishny (2002) JF  | 555   | 1         | 1  | EconLit   |
| Claessens, Djankov, Fan, and Lang (2002) JF                 | 475   | 1         | 1  | EconLit   |

| Article                                                      | Cites | Empirical | CF | CF Source |
|--------------------------------------------------------------|-------|-----------|----|-----------|
| Anderson and Reeb (2003) JF                                  | 464   | 1         | 1  | EconLit   |
| Rajan and Zingales (2003) JFE                                | 446   | 1         | 1  | Direct    |
| Dyck and Zingales (2004) JF                                  | 367   | 1         | 1  | EconLit   |
| Bansal and Yaron (2004) JF                                   | 290   | 1         | 1  | EconLit   |
| Allen, Qian, and Qian (2005) JFE                             | 267   | 1         | 0  | Direct    |
| Durnev, Kim (2005) JF                                        | 213   | 1         | 1  | EconLit   |
| Villalonga and Amit (2006) JFE                               | 357   | 1         | 1  | Direct    |
| La Porta, Lopez-De-Silanes, Shleifer, and Vishny (2006) JF   | 315   | 1         | 0  | EconLit   |
| Djankov, McLiesh, and Shleifer (2007) JFE                    | 221   | 1         | 1  | Direct    |
| Hochberg, Ljungqvist, and Lu (2007) JF                       | 167   | 1         | 1  | EconLit   |
| Djankov, La Porta, Lopez-De-Silanes, and Shleifer (2008) JFE | 273   | 1         | 1  | Direct    |
| Coles, Daniel, and Naveen (2008) JFE                         | 172   | 1         | 1  | Direct    |
| Petersen (2009) RFS                                          | 775   | 1         | 1  | Direct    |
| Brunnermeier and Pedersen (2009) RFS                         | 227   | 0         | 0  | EconLit   |
| Ivashina and Scharfstein (2010) JFE                          | 80    | 1         | 0  | Direct    |
| Campello, Graham, and Harvey (2010) JFE                      | 64    | 1         | 1  | Direct    |
| Fahlenbrach and Stulz (2011) JFE                             | 42    | 1         | 1  | Direct    |
| Demyanyk and Hemert (2011) RFS                               | 40    | 1         | 0  | Direct    |
| Gorton and Metrick (2012) JFE                                | 25    | 1         | 0  | Direct    |
| Bolton, Freixas, and Shapiro (2012) JF                       | 21    | 0         | 1  | EconLit   |

### Figure IA.1: General Publication Trends in Top-Three Finance Journals

The sample comprises all published articles in the Journal of Finance (JF), Journal of Financial Economics (JFE), and Review of Financial Studies (RFS) from the period 1970 to 2012. Except for Panel A, each panel presents annual averages per journal. Panel A reports the total number of published articles each year. Panel B reports the average number of authors per article. Panel C reports the average page count per article. Panel D provides information on the acceptance rate over time (obtained directly from the journals). Note: The JFE changed its page formatting in 2008.

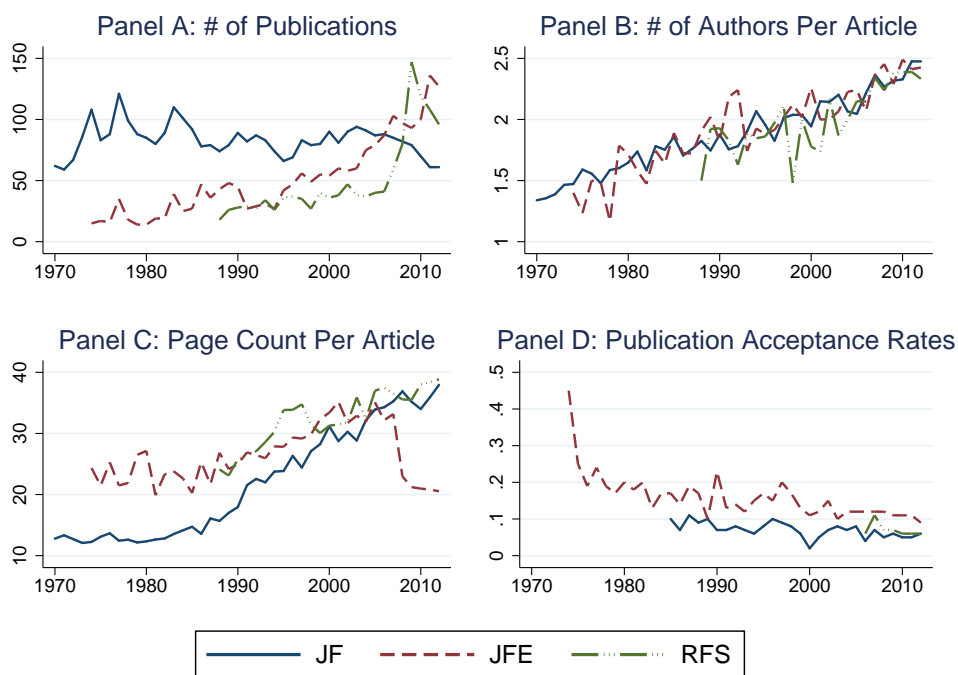

### Figure IA.2: Author Productivity

The sample comprises all published articles in the Journal of Finance (JF), Journal of Financial Economics (JFE), and Review of Financial Studies (RFS) from the period 1970 to 2012. This figure plots the cumulative distribution function of the number of articles published per author in the JF, JFE, and RFS between 1970 and 2012. We create a unique author identifier by manually combining different spellings of the same name. The total number of authors is 4,812. Note: The cumulative distribution axis starts at 0.5 for ease of readability.

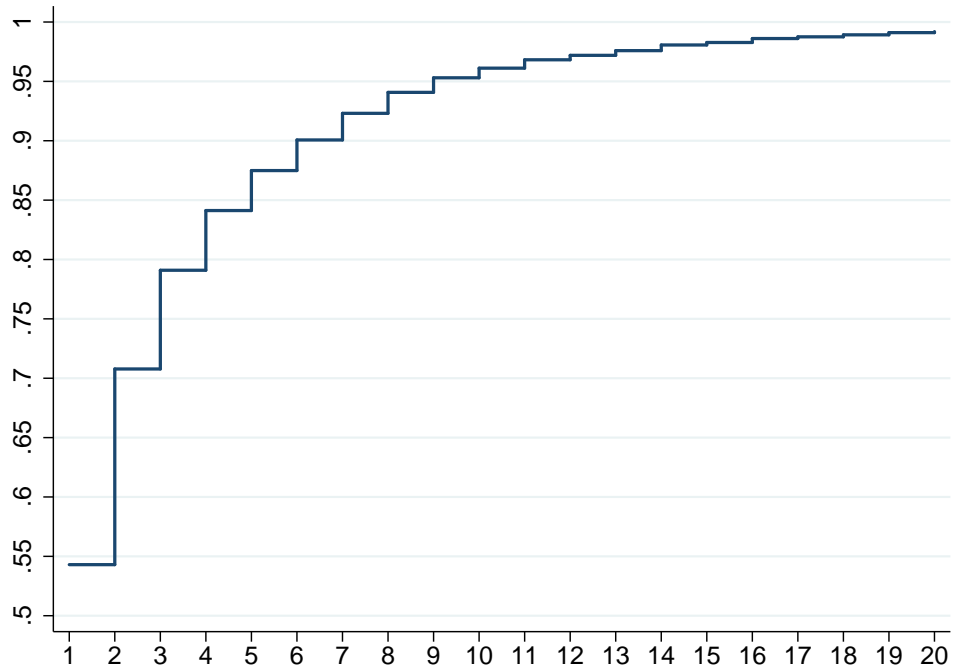

Supplement: mnsc.2016.2437-sm.pdf [file mnsc.2016.2437-sm.pdf]
